# Supplementary material for: Identity and validity of conserved B cell epitopes of filovirus glycoprotein: towards rapid diagnostic testing for Ebola and possibly Marburg virus disease
Source: PubMed Central journal article supplement (PMC6171133; doi:10.1186/s12879-018-3409-x), 2018-10-03

# FINAL REPORT

**CONFIDENTIAL**

## Transient Expression and Purification of Recombinant GP

Project Order # 340397-1

Date: 01/27/2014

**This report is provided by:**

GenScript USA Inc  
860 Centennial Ave  
Piscataway, NJ 08854  
United States of America

This study was conducted according to the procedures described in this report. All data presented are authentic, accurate and correct to the best of our knowledge. Information and materials provided by this investigation are for **research use** only.

## SIGNATURE

This report is being submitted by the following personnel.

### Prepared by

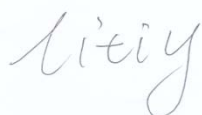

Litiy  
Staff, Bioprocess  
GenScript USA Inc



Andy Wang  
Production Manager, Bioprocess  
GenScript USA Inc

### Approved by



Zhen-Yu Liu, Ph.D.  
Director, Bioprocess  
GenScript USA Inc

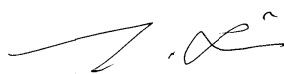

Tim Xia, Ph.D.  
VP, Biological Services  
GenScript USA Inc

# Index

|                                                    |    |
|----------------------------------------------------|----|
| 1. Project Summary .....                           | 4  |
| 2. Experimental Methods.....                       | 4  |
| 2.1 Cell Culture and Transient Transfection .....  | 4  |
| 2.2 Purification and Analysis .....                | 4  |
| 3. Experimental Results .....                      | 4  |
| 3.1 GP purified from cell culture supernatant..... | 4  |
| 3.2 GP purified from cell lysate.....              | 5  |
| 4. Conclusion and Discussion.....                  | 7  |
| 5. Packing List of Order 340397-1 .....            | 7  |
| 6. Product Information.....                        | 9  |
| Appendix .....                                     | 10 |

CONFIDENTIAL

# 1. Project Summary

This report describes the transient expression of GP protein in suspension 293-6E cells using serum free medium, followed by one-step purification from both cell culture supernatants and total membrane proteins extracted from cell lysate.

## 2. Experimental Methods

### 2.1 Cell Culture and Transient Transfection

293-6E cells were grown in serum-free FreeStyle™ 293 Expression Medium (Life Technologies, Carlsbad, CA, USA). The cells were maintained in Erlenmeyer Flasks (Corning Inc., Acton, MA) at 37°C with 5% CO<sub>2</sub> on an orbital shaker (VWR Scientific, Chester, PA). One day before transfection, the cells were seeded at an appropriate density in Corning Erlenmeyer Flasks. On the day of transfection, DNA and PEI (Polysciences, Eppelheim, Germany) were mixed at an optimal ratio and then added into the flask with cells ready for transfection. Cell pellets and cell culture supernatant were collected at day 4 post-transfection for further purification.

### 2.2 Purification and Analysis

Cell culture supernatant and total membrane proteins extracted from cell lysate were loaded onto Ni Sepharose 6 FF 0.3 mL resin (GE Healthcare, Cat.No.17-5318-02), respectively. After washing and elution, the purified protein was analyzed by SDS-PAGE and Western blot by using standard protocols for molecular weight and purity.

## 3. Experimental Results

### 3.1 GP purified from cell culture supernatant

The plasmid DNA encoding GP was transiently transfected into 100 mL suspension 293-6E cells. Cell supernatants were collected at day 4 post-transfection and the target protein was purified by loading onto Ni Sepharose 6 FF 0.3 mL resin. The samples from purification step were analyzed by SDS-PAGE and Western blot analysis as shown in Figure 1. The

primary antibody for Western blot was Mouse-anti-his mAb (GenScript, Cat.No.A00186).

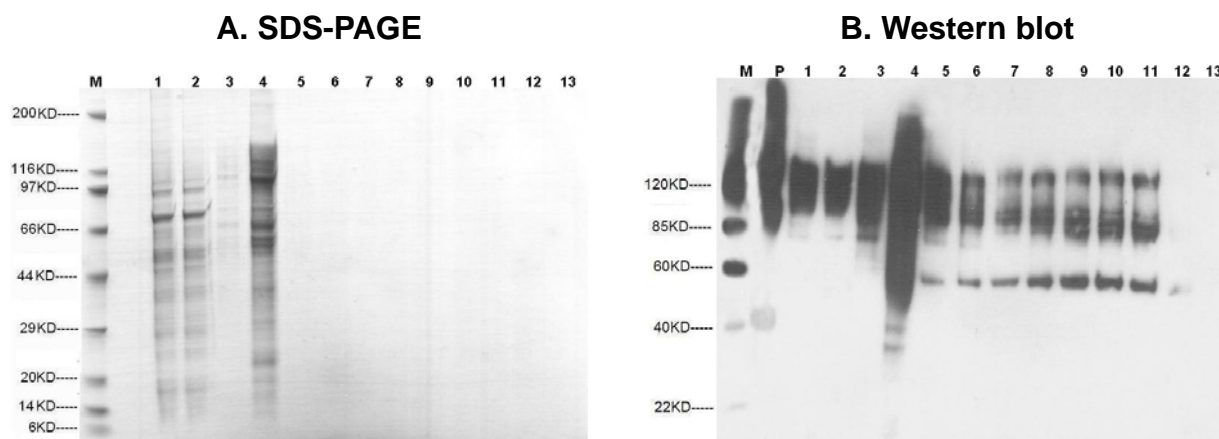

**Figure 1.** SDS-PAGE and Western blot analysis of day 4 cell culture supernatant after one-step purification

Lane M: Marker

Lane 1: Cell culture supernatant after centrifugation

Lane 2: Flow-through

Lane 3~4: 50mM imidazole eluted fractions

Lane 5~7: 100mM imidazole eluted fractions

Lane 8~11: 250mM imidazole eluted fractions

Lane 12~13: 1M imidazole eluted fractions

Lane P: Multiple-tag (GenScript, Cat.No.M0101) as positive control

We have tried to purify the target protein GP from cell culture supernatant. However, very little protein could be detected in eluted fractions. It indicated that the protein was positively expressed in suspension 293-6E cells. However, the target protein was not bound well onto the resin.

### 3.2 GP purified from cell lysate

Cell lysate collected from day 1 to day 4 post-transfection were analyzed by SDS-PAGE and Western blot as shown in Figure 2. The cells were harvested at day 4 post-transfection, lysed to collect target protein. The extracted membrane proteins were loaded onto Ni Sepharose 6 FF 0.3 mL resin to capture target protein, and analyzed by SDS-PAGE and Western blot as shown in Figure 3 ~ Figure 4. The primary antibody for Western blot was Mouse-anti-his mAb (GenScript, Cat.No.A00186).

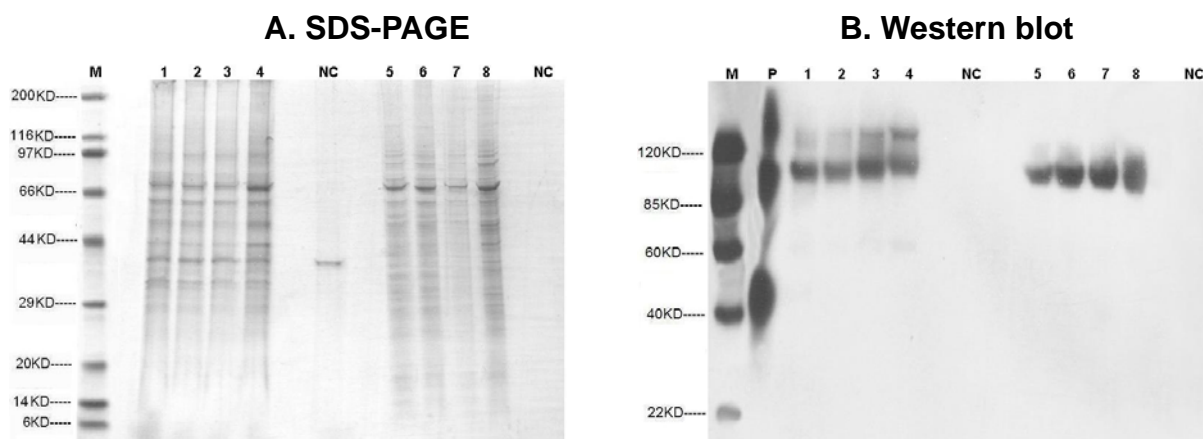

**Figure 2.** SDS-PAGE and Western blot analysis of cell lysate from day 1 to day 4 post-transfection

Lane M: Marker

Lane 1~4: Cell lysate from day 1 to day4 post-transfection with RIPA buffer

Lane 5~8: Cell lysate from day 1 to day4 post-transfection with hypotonic buffer

Lane NC: Negative control

Lane P: Multiple-tag (GenScript, Cat.No.M0101) as positive control

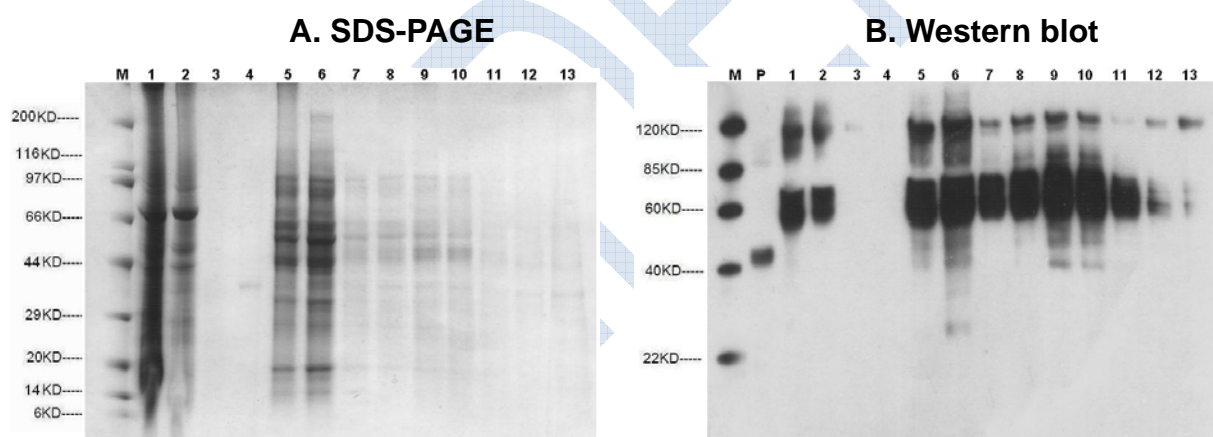

**Figure 3.** SDS-PAGE and Western blot analysis of GP from day 4 cell lysate after one-step purification

Lane M: Marker

Lane 1: Cell lysate supernatant

Lane 2: Flow-through

Lane 3~4: 50mM imidazole eluted fractions

Lane 5~8: 100mM imidazole eluted fractions

Lane 9~12: 250mM imidazole eluted fractions

Lane 13: 1M imidazole eluted fraction

Lane P: Multiple-tag (GenScript, Cat.No.M0101) as positive control

The fractions containing purified GP were collected and desalted to PBS, with 0.1% DDM,

pH 7.2. The final products were analyzed by SDS-PAGE and Western blot analysis as shown in Figure 4. The primary antibody for Western blot was Mouse-anti-his mAb (GenScript, Cat.No.A00186).

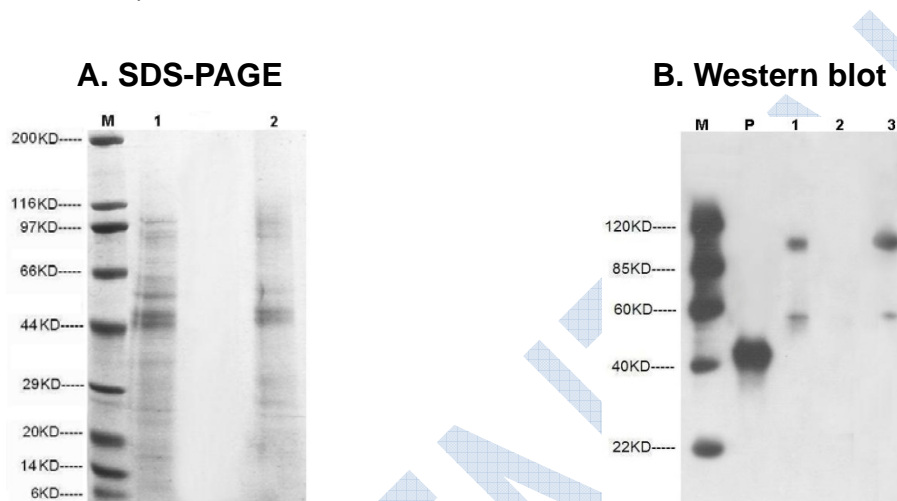

**Figure 4.** SDS-PAGE and Western blot analysis of purified GP from cell lysate after desalting

Lane M: Protein Marker

Lane 1: Reducing conditions

Lane 2: Non-reducing conditions

Lane P: Multiple-tag (GenScript, Cat.No.M0101) as positive control

## 4. Conclusion and Discussion

We have successfully expressed and purified GP in 293-6E cells from cell lysate. The purified protein was detected with estimated molecular weight of ~100 kDa (Cal.M.W. ~71.67kDa) on Western blot. 0.02 mg GP (Concentration: 0.2 mg/mL, Purity: ~50%) were delivered.

## 5. Packing List of Order 340397-1

### Protein from cell lysate

(Shipping condition: -196°C)

- . Name: GP
- . Concentration: 0.2 mg/mL
- . Volume per vial: 0.1 mL
- . Purity: ~50%

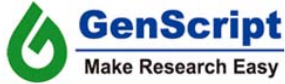

- . Buffer: PBS, with 0.1% DDM, pH 7.2
- . Lot No.: 340397S1/B0491401
- . Total protein: 0.02 mg
- . Number of vials: 1
- . Store at -80°C

CONFIDENTIAL



## 6. Product Information

**Order Number:** 340397-1  
**Protein Name:** GP  
**Fusion Tag(s):** N-His6  
**Lot Number:** 340397S1/B0491401

---

**Codon Optimization:** Yes  
**Expression System & Vector:** 293-6E cells, Mammalian Expression Vector pTT5  
**Expression Optimization:** Yes  
**Expression Scale:** 100 mL  
**Tag Removal:** No  
**Purification:** Protein was obtained from cell lysate, followed by one step purification by Ni Sepharose 6 FF resin

---

**Package:** 0.02 mg, 0.1 mL/vial, 1 vial  
**Concentration:** 0.2 mg/mL as determined by Bradford assay  
**Purity:** About 50% as estimated by densitometric analysis of the Coomassie Blue-stained SDS-PAGE gel  
**Storage and Handling:** Store at -80°C. Aliquots should be stored at the same temperature after first use to avoid multiple freeze-thaws  
**Storage Buffer:** PBS with 0.1% DDM, pH 7.2

## Appendix

### Cloning Strategy:

EcoRI -- Kozak sequence -- ATG -- Artificial Signal Peptide -- 6xHis -- Target Protein Envelope glycoprotein (33-671 aa optimized for HEK293) -- stop codon -- HindIII

### DNA Sequence:

2034 bp

```

GAATTCccGCCGCCACCATGGGCTGGTCTGTATTATCCTGTTTCTGGTTCGCAACCGCTACTGGCGTCCACTCAATCA
TCATCATCATCACATGCCCTCTGGGAGTGGTCACTAATAGCACCCCTGGAAGTGACCGAGATCGATCAGCTGGTCTGTAAGG
ACCACCTGGCTTCTACAGATCAGCTGAAAAGTGTGGGCCCTGAACCTGGAGGGATCAGGCGTCAGCACCGATATCCCTTCT
GCAACAAAGCGATGGGGCTTCCGGAGTGGAGTGCCACCTAAAGTGGTCTCATACGAAGCCGGCGAGTGGGCTGAAAACCTG
CTATAATCTGGAGATCAAGAAACCTGATGGGAGCGAATGTCTGCCACCACCTCCAGACGGAGTGAGGGGATTCCCAAGAT
GCAGATACGTCCACAAGGCTCAGGGGACCGGACCTTGTCCAGGGGACTATGCCTTTATAAAGATGGAGCTTTCTTTCTG
TACGACCGGCTGGCCTCTACCGTGATCTATAGAGGAGTCAATTCGCTGAGGGCGTGATCGCATTCTGATTCTGGCCAA
GCCAAAAGAAACCTTCTGCAGAGCCCCCTATTTCGCGAGGCGTGAATTACACAGAAAACACTAGCTCCTACTATGCTA
CAAGCTACCTGGAGTATGAAATCGAGAACTTTGGCGCCAGCACTCCACCACACTGTTCAAGATCGATAACAACACATTT
GTGCGGCTGGACAGACCCCATACTCCTCAGTTCCTGTTTCAGCTGAATGACACTATCCACCTGCATCAGCAGCTGAGCAA
CACTACCGGGCGGCTGATTTGGACACTGGACGCAAACATCAATGCCGATATTGGAGAGTGGGCATTCTGGGAAAACAAGA
AAAATCTGTCCGAGCAGCTGAGAGGGGAGGAACCTGAGCTTTGAAGCCCTGTCCCTGAATGAAACCGAGGACGATGACGCC
GCTTCTAGTAGAATCACAAGGGAAGGATTTCCGATAGGGCCACACGCAAGTACTCAGACCTGGTGCCAAAAAACAGCCC
CGAATGGTCCCTCTGCACATCCCAGAAGGCGAGACAACCTTGCCATCCCAGAACAGCACTGAGGGACGGAGAGTGGGCG
TCAACACCCAGGAGACAATTACTGAAACCGCAGCCACCATCATTGGGACAAACGAAATCACATGCAGATCTCTACCATC
GGCATTTCGGCCCTCAAGCTCCCAGATTCCCTCTAGTTCACCTACCACAGCTCCAGTCCCTGAGGCACAGACACCAACTAC
CCATACTAGTGGGCCCTCAGTGATGGCCACCGAGGAACCCACAACCTCCACCAGGAAGCTCCCCAGGACCAACCACAGAGG
CACCTACACTGACTACCCAGAAAATATCACAACCTGCCGTGAAGACTGTCTGCCTCAGGAGTCTACCAGTAACGGCCTG
ATCACAAGCACTGTGACCGGCATTCTGGGGTCCCTGGGACTGCGCAAACGATCTAGGCGCCAGACAAATACTAAGGCTAC
AGGAAAATGCAACCCCAATCTGCACACTTGGACTGCACAGGAGCAGCATAACGCTGCAGGCATCGCTTGGATTCCATACT
TCGGCCCCGGGGCAGAGGGCATCTATACCGAAGGGCTGATGCATAACCAGAATGCACCTGGTGTGCGGACTGCGACAGCTG
GCAAAATGAGACCACACAGGCCCTGCAGCTGTTCTGCGCGCCACTACCGAACCTCGCAACCTATAACAATCTGCAACGGAA
GGCTATTGATTTTCTGCTGCGCAGGTGGGGAGGAACCTGCCGCATCCTGAGGACCAGACTGTGATTGAGCCTCACGATT
GGACTAAGAAATATCACCGACAAAATTAACCAGATCATTATGACTTCATCGACAACCCCTCTGCCAAAACAGGACAATGAT
GACAACTGGTGGACCGGCTGGAGACAGTGGATCCCTGCCGGGATTGGCATCACTGGGATTATTATCGCCATCATCGCCCT
GCTGTGCGTCTGTAAACTGCTGTGCTGATAAGCTT
  
```

### Protein Sequence:

669 aa

```

MGWSCIILFLVATATGVHShhhhhhhmplgvvtnstlevteidqlvckdhlstdqlksvglnllegsgvstdipsatkrwg
frsgvppkvvsyeagewaencynleikkpdgseclppppdgvrvgfprcryvhkaqgtgpcpgdyafhkdgafflydras
tviyrgvnfaegviaflilakpketflqsppireavnytentssyyatsyleyeienfgahsttlfkidnntfvrlrdp
htpqflfqlnndtihlqqslsnttgrliwtldaninadigewafwenknlseqlrgeelsfealslneteddaasrit
kgridratrkydsdlvpknspgmvlhipegettllpsqnstegrrvgvntqetitetataatiigtngnhmqistigirpss
sqipssspttapspeaqtptthtsgpsvmateepttppgsspgptteaptltpenittavktvlpqestsnglitstvt
gilgslglrkrstntkatgkcnplhywtaeqqhnaagiawipyfgpagaegiyteglmhnqnalvcglrqlanettq
alqlflrattelrtytilnrkaidflrrwggtrilgpdcciephdwtknitdkinqihdfidnplpnqnddnwwtg
wrqwipagigitgiiiiiaiallcvcckllc
  
```

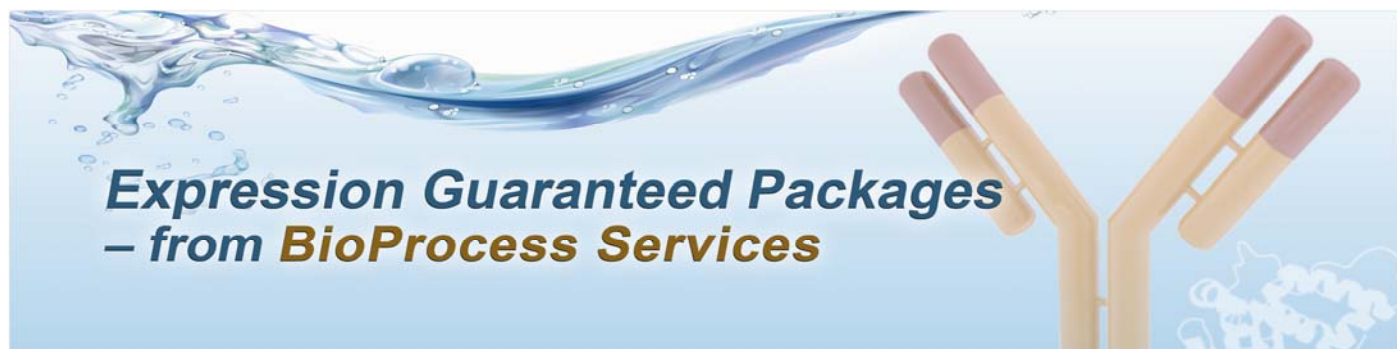

### Guaranteed antibody expression in mammalian cells

MamPower™ Guaranteed Antibody Package (SC1259A) Promotion

Guaranteed expression of recombinant antibodies in mammalian cells

- 50 mg antibody Guaranteed – or it's FREE\*
- Starting from **\$8,499** (Gene synthesis fee included)

For more details, please visit [http://www.genscript.com/bioprocess\\_promotion\\_a.html](http://www.genscript.com/bioprocess_promotion_a.html)

### Guaranteed 3mg Protein – or it is FREE

MamPower™ Guaranteed Protein Package (SC1259P) Promotion

An unprecedented guarantee package that no others can offer

- 3 mg protein Guaranteed
- Starting from **\$8,900** (Gene synthesis fee included)

For more details, please visit [http://www.genscript.com/bioprocess\\_promotion\\_p.html](http://www.genscript.com/bioprocess_promotion_p.html)

\*Certain rules may apply, please check our website for details

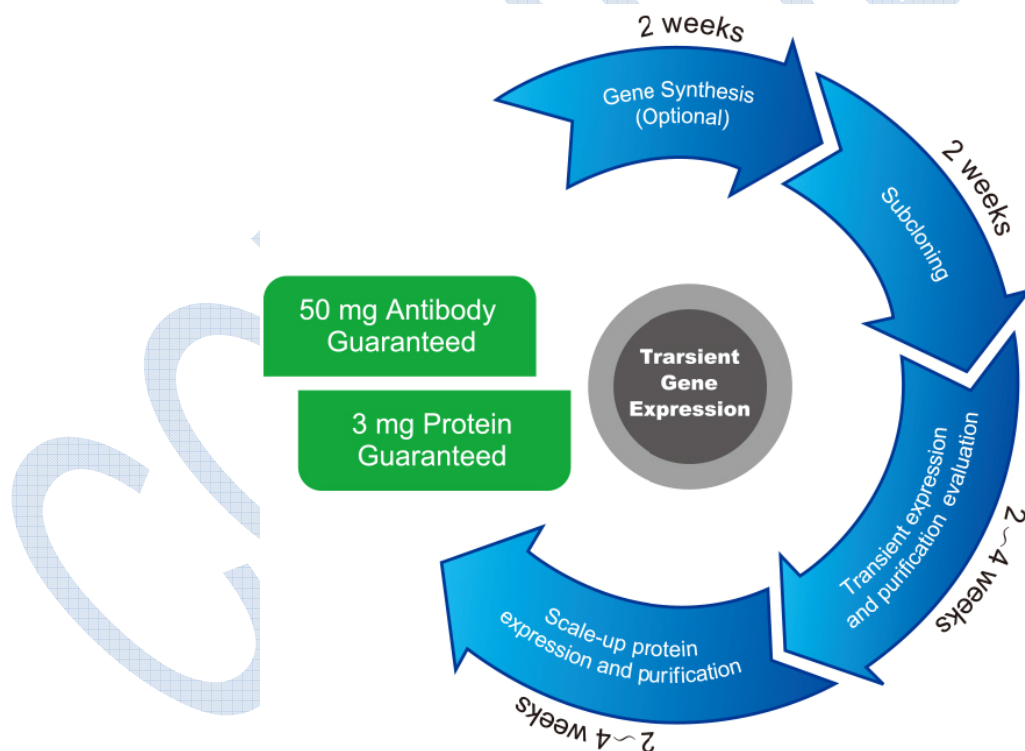

Supplement: 12879_2018_3409_MOESM1_ESM.pdf [file 12879_2018_3409_MOESM1_ESM.pdf]
