# Supplementary material for: Identity and validity of conserved B cell epitopes of filovirus glycoprotein: towards rapid diagnostic testing for Ebola and possibly Marburg virus disease
Source: Springer Nature journal article supplement (doi:10.1186/s12879-018-3409-x), 2018-10-03
Supplement: MOESM2 [file 16170096]

## CERTIFICATE OF ANALYSIS

### 1. Project Data:

|                  |                                                                                                                                                                                                                                                                                                                                                                                                    |                          |                            |                            |
|------------------|----------------------------------------------------------------------------------------------------------------------------------------------------------------------------------------------------------------------------------------------------------------------------------------------------------------------------------------------------------------------------------------------------|--------------------------|----------------------------|----------------------------|
| Date:            | 2014-5-15                                                                                                                                                                                                                                                                                                                                                                                          |                          |                            |                            |
| Order ID         | AB130017                                                                                                                                                                                                                                                                                                                                                                                           |                          |                            |                            |
| Product ID:      | A005345                                                                                                                                                                                                                                                                                                                                                                                            | A005346                  |                            |                            |
| Antibody Name:   | ARZ-ssGP                                                                                                                                                                                                                                                                                                                                                                                           | ARZ-GP2                  |                            |                            |
| Antigen          | YEAGEWAENCY                                                                                                                                                                                                                                                                                                                                                                                        | CGLRQLANETTQALQLFLRATTEL |                            |                            |
| Peptide ID:      | 384921                                                                                                                                                                                                                                                                                                                                                                                             | 384922                   |                            |                            |
| Lot # of         | A140123-QL2390                                                                                                                                                                                                                                                                                                                                                                                     | A140123-QL2391           |                            |                            |
| Concentration :  | 0.5mg/ml(HRP labelled)                                                                                                                                                                                                                                                                                                                                                                             |                          | 0.5mg/ml(HRP labelled)     |                            |
| Volumn :         | 6ml(before lyophilized)                                                                                                                                                                                                                                                                                                                                                                            |                          | 6ml(before lyophilized)    |                            |
| Animal ID :      | RB4933                                                                                                                                                                                                                                                                                                                                                                                             | RB4934                   | RB4935                     | RB4936                     |
| Concentration :  | 1.05mg/ml                                                                                                                                                                                                                                                                                                                                                                                          | 0.89mg/ml                | 0.79mg/ml                  | 0.82mg/ml                  |
| Volumn :         | 3ml( before lyophilized)                                                                                                                                                                                                                                                                                                                                                                           | 3ml( before lyophilized) | 3.5ml( before lyophilized) | 3.5ml( before lyophilized) |
| Store Condition: | <p>With 0.02% NaN<sub>3</sub> before lyophilized. <b>HRP labelled antibody doesn't contain the NaN<sub>3</sub>, and it is recommended to dissolve to 1mg/ml with 1 :5000-1 :10000 woking dilution.</b></p> <p>Store at 4°C if to be used in less than 1 week after dissolved, for long-term storage at -20°C.</p> <p>Antibody at working concentration shall be made and used in the same day.</p> |                          |                            |                            |

### 2. Identification Data:

#### ELISA:

Coating Antigens: recombinant protein

Coating Concentration: 2 ug/ml, 100ul / well

Coating Buffer: Phosphate Buffered Saline, pH7.4

Secondary Antibody: Goat Anti-Rabbit IgG (H+L), HRP Conjugated

*Elisa result for Antigen Affinity Purified Pab*

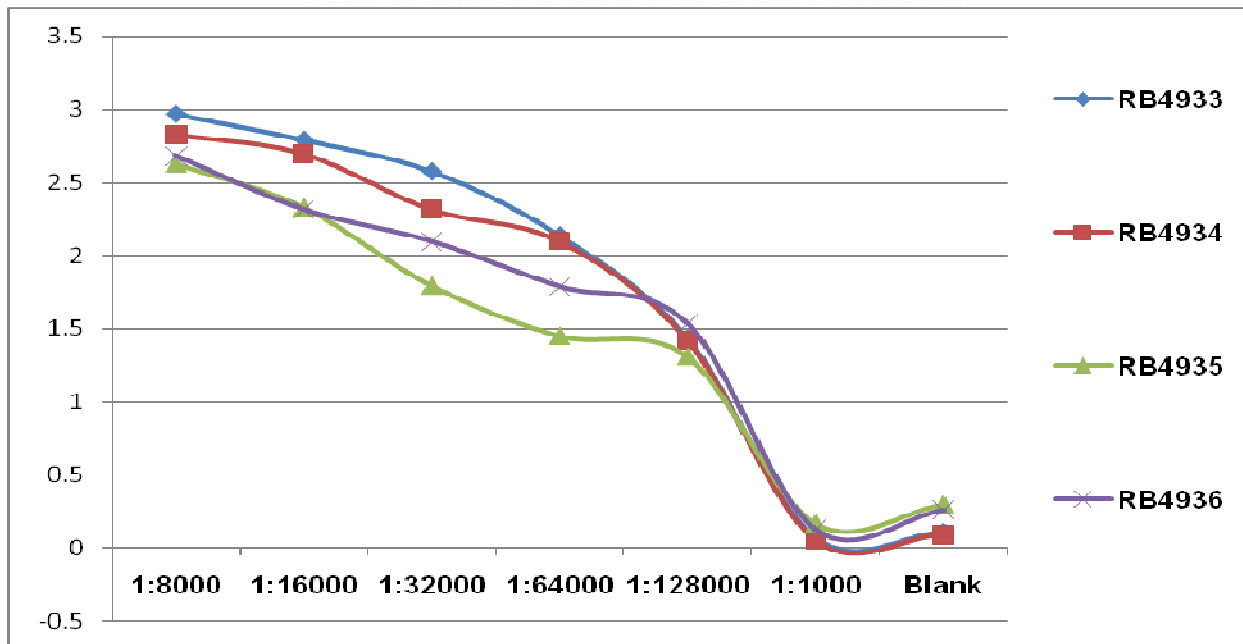

| Animal ID | Blank | (-) 1 :1K | SA 1:8K | SA 1:16K | SA 1 :32K | SA 1 :64K | SA 1 :128K |
|-----------|-------|-----------|---------|----------|-----------|-----------|------------|
| RB4933    | 0.104 | 0.067     | 2.965   | 2.789    | 2.573     | 2.135     | 1.434      |
| RB4934    | 0.091 | 0.054     | 2.829   | 2.698    | 2.316     | 2.098     | 1.423      |
| RB4935    | 0.295 | 0.166     | 2.628   | 2.33     | 1.793     | 1.449     | 1.308      |
| RB4936    | 0.262 | 0.131     | 2.684   | 2.316    | 2.098     | 1.789     | 1.538      |

(-) :Negative serum    1:1000    OD <0.2  
 SA: Peptide affinity purified Pab    1 :128K    OD>1.0  
 Elisa Titer>1 :128K

### Delivery list:

| Product ID           | Animal ID | Pre-Bleed(-)     | Post-Bleed(+)    | Peptide    | Purified Antibody |
|----------------------|-----------|------------------|------------------|------------|-------------------|
| A005345              | RB4933    | 0.5-0.6ml/1 vial | 0.5-0.6ml/1 vial | 3mg/1 vial | 3ml/1 vial        |
|                      | RB4934    | 0.5-0.6ml/1 vial | 0.5-0.6ml/1 vial |            | 3ml/1 vial        |
| HRP labelled A005345 | —         | —                | —                | —          | 6ml/1 vial        |
| A005346              | RB4935    | 0.5-0.6ml/1 vial | 0.5-0.6ml/1 vial | 3mg/1 vial | 3.5ml/1 vial      |
|                      | RB4936    | 0.5-0.6ml/1 vial | 0.5-0.6ml/1 vial |            | 3.5ml/1 vial      |
| HRP labelled A005345 | —         | —                | —                | —          | 6ml/1 vial        |

### Antibody use/dissolution

1. Add deionized or distilled water to reconstitute the lyophilized products and mix gently by inverting 5-6 times at room temperature.
2. It may take a few minutes to reconstitute a lyophilized product. If insoluble matter is observed, remove precipitation by centrifugation at 3000 rpm or higher for 10-15 min, transfer supernatant to a fresh tube.

# GeneCust

## Custom Services for Research

3. For lyophilized antisera or preimmune sera, reconstitute to the original volume as described on the data sheet or report sheet.
4. For lyophilized purified antibodies, reconstitute to a final antibody concentration according to your applications or the recommended concentration on the data sheet.
5. The reconstituted antibody can be stored for 2-3 weeks at 2-8°C or for up to 12 months at -20°C or below. Avoid repeated freeze and thaw cycles.
6. Lyophilized product remains stable for at least one year if stored at -20°C or below.

**Note: 0.02% of sodium azide was added as preservative before lyophilization.**
